# Supplementary material for: Changing conversations in primary care for patients living with chronic conditions: pilot and feasibility study of the ICAN Discussion Aid
Source: PubMed Central journal article supplement — BMJ Open. 2019 Sep 3;9(9):e029105. doi: 10.1136/bmjopen-2019-029105 (PMC6731832; doi:10.1136/bmjopen-2019-029105), 2019-09-03
Supplement: bmjopen-2019-029105supp001.pdf [file bmjopen-2019-029105supp001.pdf]

## Appendix 1: Pharmaceutical prescription methods and results

*Measure*

Patients' prescriptions that had been filled were obtained from their pharmacies directly. We collected information on patients' filled prescriptions six months prior to enrollment to six months post-enrollment. Adherence to treatment was assessed for the six months post-enrollment by calculating the percentage of days out of the 180 day period for which a patient had a filled prescription.[23] Medications to treat chronic conditions were considered for inclusion in analysis.

| <b>Medication Class</b>                   | <b>Medication Name</b>     |
|-------------------------------------------|----------------------------|
| <b>ACE inhibitor</b>                      | <b>Enalapril Maleate</b>   |
|                                           | <b>Lisinopril</b>          |
|                                           | <b>Ramipril</b>            |
| <b>Alpha blocker</b>                      | <b>Tamsulosin</b>          |
|                                           | <b>Tamsulosin HCL</b>      |
| <b>Alpha1 adrenergic blocker</b>          | <b>Doxazosin Mesylate</b>  |
| <b>Alpha2 delta ligand</b>                | <b>Lyrica</b>              |
| <b>Aminoketone antidepressant</b>         | <b>Bupropion</b>           |
|                                           | <b>Bupropion HCL</b>       |
|                                           | <b>Bupropion HCL ER</b>    |
|                                           | <b>Bupropion XL</b>        |
|                                           | <b>SR Bupropion</b>        |
| <b>Angiotensin receptor blocker (ARB)</b> | <b>Candesartan</b>         |
|                                           | <b>Lorsartan Potassium</b> |
|                                           | <b>Losartan</b>            |
|                                           | <b>Losartan -HCTZ</b>      |
|                                           | <b>Losartan HCTZ</b>       |
|                                           | <b>Losartan Potassium</b>  |
|                                           | <b>Losartan-HCTZ</b>       |
|                                           | <b>Valsartan</b>           |
| <b>Antiandrogen</b>                       | <b>Bicalutamide</b>        |
| <b>Antiarrhythmic drug</b>                | <b>Amiodarone</b>          |
|                                           | <b>Flecainide Acetate</b>  |

| <b>Appendix Table 1: Included Medications</b> |                                |
|-----------------------------------------------|--------------------------------|
| <b>Medication Class</b>                       | <b>Medication Name</b>         |
| <b>Anticoagulant</b>                          | <b>Enoxaparin Sodium</b>       |
|                                               | <b>Jantoven</b>                |
|                                               | <b>Warfarin Sodium</b>         |
|                                               | <b>Xarelto</b>                 |
| <b>Anticonvulsant</b>                         | <b>Carbamazepine</b>           |
|                                               | <b>Carbamazepine ER</b>        |
|                                               | <b>Gabapentin</b>              |
|                                               | <b>Lamotrigine</b>             |
|                                               | <b>Topiramate</b>              |
|                                               | <b>Zonisamide</b>              |
| <b>Anxiolytic antianxiety agent</b>           | <b>Buspirone</b>               |
| <b>Atypical antipsychotic</b>                 | <b>Latuda</b>                  |
|                                               | <b>Quetiapine</b>              |
|                                               | <b>Quetiapine Fumarate</b>     |
| <b>Beta blocker</b>                           | <b>Atendlol Chlorthalidone</b> |
|                                               | <b>Atenolol</b>                |
|                                               | <b>Bisoprolol</b>              |
|                                               | <b>Carvedilol</b>              |
|                                               | <b>ER Metoprolol</b>           |
|                                               | <b>Metoprolol ER</b>           |
|                                               | <b>Metoprolol ER Succinate</b> |
|                                               | <b>Metoprolol SUCC ER</b>      |
|                                               | <b>Metoprolol Tart</b>         |
|                                               | <b>Metoprolol Tartrate</b>     |
|                                               | <b>Metoprololhydrochloroth</b> |
|                                               | <b>Timolol Maleate</b>         |
| <b>Biguanide</b>                              | <b>Metforman</b>               |
|                                               | <b>Metformin</b>               |
|                                               | <b>Metformin ER</b>            |
|                                               | <b>Metformin HCL</b>           |

| <b>Appendix Table 1: Included Medications</b>       |                                   |
|-----------------------------------------------------|-----------------------------------|
| <b>Medication Class</b>                             | <b>Medication Name</b>            |
|                                                     | <b>Metformin HCL ER</b>           |
|                                                     | <b>metformin</b>                  |
| <b>Bisphosphonate</b>                               | <b>Alendronate</b>                |
|                                                     | <b>Alendronate Sodium</b>         |
| <b>Calcium channel blocker</b>                      | <b>Amlodipine</b>                 |
|                                                     | <b>Amlodipine Besylate</b>        |
|                                                     | <b>Diltiazem HCL ER</b>           |
|                                                     | <b>Nifedipine</b>                 |
|                                                     | <b>Verapamil HCR ER</b>           |
| <b>Central alpha agonist</b>                        | <b>Clonidine HCL</b>              |
| <b>Central muscle relaxant</b>                      | <b>Methocarbamol</b>              |
| <b>Class 1b antiarrhythmic drug</b>                 | <b>Lidocaine</b>                  |
| <b>DDP4 inhibitor + biguanide</b>                   | <b>Janumet XR</b>                 |
| <b>Dibenzazepine</b>                                | <b>Tegretol XR</b>                |
| <b>Digitalis glycoside</b>                          | <b>Digoxin</b>                    |
| <b>Disease modifying antirheumatic drug (DMARD)</b> | <b>Hydroxychloroquine Sulfate</b> |
| <b>Diuretic</b>                                     | <b>Hydrochlorothiazide</b>        |
|                                                     | <b>Hydrochlorothiazide</b>        |
|                                                     | <b>Metolazone</b>                 |
| <b>Fibric acid</b>                                  | <b>Fenofibrate</b>                |
|                                                     | <b>Fenofibrate Micronized</b>     |
| <b>Janus kinase (JAK) inhibitors</b>                | <b>Xeljanz</b>                    |
| <b>Leukotriene receptor antagonists</b>             | <b>Montelukast Sodium</b>         |
| <b>Loop diuretic</b>                                | <b>Furobemide</b>                 |
|                                                     | <b>Furosemide</b>                 |
|                                                     | <b>Torseamide</b>                 |
| <b>Nitrate</b>                                      | <b>Isosorb Mono ER</b>            |
|                                                     | <b>Isosorbide MN ER</b>           |
| <b>Nonergoline dopamine agonist</b>                 | <b>Pramipexole</b>                |
| <b>Oral diuretic</b>                                | <b>Triamterene-HCTZ</b>           |

| <b>Appendix Table 1: Included Medications</b>       |                              |
|-----------------------------------------------------|------------------------------|
| <b>Medication Class</b>                             | <b>Medication Name</b>       |
| <b>P2Y12 inhibitor</b>                              | <b>Clopidogrel</b>           |
|                                                     | <b>Clopidogrel Bisulfate</b> |
| <b>Phenylpiperazine antidepressant</b>              | <b>Nefazodone HCL</b>        |
| <b>Phosphodiesterase 4 (PDE4) inhibitors</b>        | <b>Otezla</b>                |
| <b>Potassium sparing diuretic</b>                   | <b>Spirolactone</b>          |
| <b>SNRI</b>                                         | <b>Desvenlafaxine ER</b>     |
|                                                     | <b>Duloxetine DR</b>         |
|                                                     | <b>Duloxetine HCL</b>        |
|                                                     | <b>Duloxetine Hcl</b>        |
|                                                     | <b>ER Venlafaxine</b>        |
|                                                     | <b>Escitalopram Oxalate</b>  |
|                                                     | <b>Venlafaxine XR</b>        |
|                                                     | <b>Venlafaxin XR</b>         |
|                                                     | <b>Venlafaxine ER</b>        |
|                                                     | <b>Venlafaxine HCL ER</b>    |
|                                                     | <b>Venlafaxine XR</b>        |
| <b>SSRI</b>                                         | <b>Citalopram</b>            |
|                                                     | <b>Citalpram</b>             |
|                                                     | <b>Fluoxetine</b>            |
|                                                     | <b>Fluoxetine HCL</b>        |
|                                                     | <b>Paroxetine</b>            |
|                                                     | <b>Paroxetine HCL</b>        |
|                                                     | <b>Sertraline</b>            |
|                                                     | <b>Sertraline HCL</b>        |
| <b>Selective estrogen receptor modulator (SERM)</b> | <b>Raloxifene HCL</b>        |
|                                                     | <b>Tamoxifen</b>             |
| <b>Statin</b>                                       | <b>Atorvastatin</b>          |
|                                                     | <b>Atorvastatin Calcium</b>  |
|                                                     | <b>Locastatin</b>            |
|                                                     | <b>Lovastatin</b>            |

| <b>Appendix Table 1: Included Medications</b> |                              |
|-----------------------------------------------|------------------------------|
| <b>Medication Class</b>                       | <b>Medication Name</b>       |
|                                               | <b>Pravastatin Sodium</b>    |
|                                               | <b>Rosuvastatin Calcium</b>  |
|                                               | <b>Simvastatin</b>           |
|                                               | <b>Vytorin</b>               |
| <b>Sulfonylurea</b>                           | <b>Climepiride</b>           |
|                                               | <b>Glimepiride</b>           |
|                                               | <b>Glipizide</b>             |
|                                               | <b>Glipizide ER</b>          |
|                                               | <b>Glipizide XL</b>          |
| <b>Tetracyclic antidepressant</b>             | <b>Mirtazapine</b>           |
| <b>Thiazide diuretic</b>                      | <b>Chlorthalidone</b>        |
| <b>Thyroxine; T4 (synthetic)</b>              | <b>Levothroxine</b>          |
|                                               | <b>Levothyroxine</b>         |
|                                               | <b>Levothyroxine SOD</b>     |
|                                               | <b>Synthroid</b>             |
| <b>Triazolopyridine antidepressant</b>        | <b>Trazodone HCL</b>         |
| <b>Tricyclic antidepressant</b>               | <b>Amitriptyline HCL</b>     |
|                                               | <b>Cyclobenzaprine HCL</b>   |
|                                               | <b>Cyclovenzaprine HCL</b>   |
|                                               | <b>Cyclovenzaprine HCL</b>   |
|                                               | <b>Nortriptyline</b>         |
|                                               | <b>Nortriptyline</b>         |
|                                               | <b>Nortriptyline HCL</b>     |
| <b>Triiodothyronine</b>                       | <b>Liothyronine Sodium</b>   |
| <b>Valeric acid</b>                           | <b>Gemfibrozil</b>           |
| <b>Missing</b>                                | <b>Missing</b>               |
| <b>Other / Unknown</b>                        | <b>Amsulosin</b>             |
|                                               | <b>Isometh-apap-dichlor-</b> |
|                                               | <b>Metromin HCL</b>          |
|                                               | <b>Oxycodone 5MG IR Tabs</b> |

*Statistical Analysis*

Adherence to medications was assessed by medication class (i.e. if patient had multiple medications within a class, average adherence was calculated). Adherence was modeled using a hierarchical generalized linear model where the outcome was a patients' medication class adherence six months post enrollment. The model was clustered by patient, as patients could have multiple classes of medication, and adjusted by their adherence to the medication class in the six months prior to enrollment and intervention arm. Patients who did not have the medication class in the prior period were set to zero for baseline and a missing indicator was assessed in the model to address this. Patients with missing pharmacy data (e.g. their pharmacy

*Adherence Results*

Similar rates of medication counts, medication classes and adherence were seen between groups in the six months prior to the encounter of interest (76% of days covered in patients in the ICAN group vs. 71% control) was unreachable for data request) were not included in the analysis.

| <b>Appendix Table 2: Analysis of percent of days covered of medication classes by intervention.</b> |                |                                |         |
|-----------------------------------------------------------------------------------------------------|----------------|--------------------------------|---------|
|                                                                                                     | ICAN<br>(N=53) | Pre-<br>Intervention<br>(N=27) | p value |
| <b>Count of medications prior to encounter</b>                                                      |                |                                | 0.57    |
| Mean (SD)                                                                                           | 3.6 (2.6)      | 4.2 (3.3)                      |         |
| Median (IQR)                                                                                        | 3 (2, 5)       | 4 (2, 5)                       |         |
| <b>Count of medication classes prior to encounter</b>                                               |                |                                | 0.54    |
| Mean (SD)                                                                                           | 3.4 (2.3)      | 3.9 (2.9)                      |         |
| Median                                                                                              | 3 (1, 5)       | 4 (2, 5)                       |         |
| <b>Adherence (PDC) prior to encounter</b>                                                           |                |                                | 0.94    |
| Mean (95% CI)                                                                                       | 55% (50, 60)   | 54% (50, 60)                   |         |
| <b>Count of medications post encounter</b>                                                          |                |                                | 0.37    |
| Mean (SD)                                                                                           | 3.8 (2.5)      | 4.1 (2.0)                      |         |
| Median                                                                                              | 3 (2, 5)       | 4 (3, 5)                       |         |
| <b>Count of medication classes post encounter</b>                                                   |                |                                | 0.36    |
| Mean (SD)                                                                                           | 3.6 (2.3)      | 3.9 (1.8)                      |         |
| Median                                                                                              | 3 (2, 5)       | 4 (3, 5)                       |         |

| <b>Appendix Table 2: Analysis of percent of days covered of medication classes by intervention.</b> |                |                                |         |
|-----------------------------------------------------------------------------------------------------|----------------|--------------------------------|---------|
|                                                                                                     | ICAN<br>(N=53) | Pre-<br>Intervention<br>(N=27) | p value |
| <b>Adherence (PDC) post encounter</b>                                                               |                |                                | 0.56    |
| Mean (95% CI)                                                                                       | 75% (70, 80)   | 71% (60, 80)                   |         |
| <b>Adjusted adherence (PDC) post encounter<sup>^</sup></b>                                          |                |                                | 0.43    |
| Mean (95% CI)                                                                                       | 76% (70, 80)   | 72% (60, 80)                   |         |

Acronym: PDC Percent of Days Covered

\* Prior and post encounter periods are each 6 months long.

<sup>^</sup> ANCOVA with random effect of clinician and adjusted by prior 6 months adherence and intervention.
